# Supplementary material for: The Presence of Another Individual Influences Listening Effort, But Not Performance
Source: PubMed Central journal article supplement — Ear Hear. 2021 Apr 1;42(6):1577–89. doi: 10.1097/AUD.0000000000001046 (PMC8542087; doi:10.1097/aud.0000000000001046), 2021-04-01
Supplement: aud-42-1577-s001.pdf [file aud-42-1577-s001.pdf]

## APPENDIX A

1

### 2 **Subjective rating scales**

3 Below are the used subjective rating scales in Dutch, together with their English translation and  
4 accompanying labels.

#### 5 • Effort

6 Geef aan hoeveel inspanning u (gemiddeld) nodig had om de spraak te verstaan.

7 *(Indicate how much effort you needed (on average) to understand the speech material.)*

8 1-2 No effort

9 3-4 Little effort

10 5-6 Average effort

11 7-8 Much effort

12 9-10 Very much effort

#### 13 • Performance

14 Hoe goed kon u de zinnen verstaan?

15 *(How well could you understand the sentences?)*

16 1-2 Understood none

17 3-4 Understood a bit

18 5-6 Understood half

19 7-8 Understood many

20 9-10 Understood all

21 • Giving-up

22 Bij hoeveel zinnen was de spraak zo slecht hoorbaar dat het eigenlijk geen zin meer had om nog te  
23 proberen de zin te verstaan? Ik heb bij ...

24 *(At how many sentences was the speech material so poorly intelligible that there was no use to  
25 remain listening anymore? I have given up at...)*

26 1-2 None of the sentences

27 3-4 A few sentences

28 5-6 Half of the sentences

29 7-8 Many of the sentences

30 9-10 All of the sentences

31 • Difficulty

32 Hoe moeilijk vond u de opdracht?

33 *(How difficult did you perceive the task to be?)*

34 1-2 Not at all

35 3-4 A bit

36 5-6 Average

37 7-8 Above average

38 9-10 Very

39 **Connectedness for Groups Questionnaire**

40 Below are the connectedness for groups questions that were used in this study (English translation  
41 between brackets). Answers could be any integer from one (strongly disagree) to ten (strongly  
42 agree).

43 1. Ik voel mij verbonden met de andere participant (*I feel connected with the other participant*).

44 2. Ik voel mij solidair met de andere participant (*I feel solidary with the other participant*).

45 3. Ik voel mij betrokken met de andere participant (*I feel involved with the other participant*).

46 4. Ik heb veel overeenkomsten met de andere participant (*I have many similarities with the*  
47 *other participant*).

48 5. Ik lijk veel op de andere participant (*I look a lot like the other participant*).
